# Supplementary material
Source: PubMed Central journal article supplement (PMC3122328)
Supplement: NIHMS303502-supplement-01.pdf [file NIHMS303502-supplement-01.pdf]

**Supplementary Table 1:** Group differences in subregional volumes for left and right hippocampus.

|       |        | Controls     | MS (BDI 0-13)            | MS (BDI>13)               | p*              |
|-------|--------|--------------|--------------------------|---------------------------|-----------------|
| Left  | CA1    | 1252.2±33.0  | 1150.9±22.1 <sup>a</sup> | 1070.7±30.8 <sup>b</sup>  | <b>.002</b>     |
|       | CA23DG | 1859.2±63.5  | 1841.6±41.7              | 1617.5±51.4 <sup>b</sup>  | <b>.039</b>     |
|       | Sub    | 886.3±26.1   | 816.4±14.8               | 752.3±39.7 <sup>b</sup>   | <b>.005</b>     |
|       | ERC    | 596.2±31.3   | 578.0±21.2               | 523.1±49.4                | .373            |
|       | Total  | 4593.9±130.2 | 4386.8±75.4              | 3963.7±152.0 <sup>b</sup> | <b>.009</b>     |
| Right | CA1    | 1230.1±30.2  | 1080.9±22.9 <sup>a</sup> | 1056.7±25.5 <sup>b</sup>  | <b>&lt;.001</b> |
|       | CA23DG | 1705.1±45.0  | 1674.2±39.7              | 1499.2±43.2 <sup>b</sup>  | <b>.031</b>     |
|       | Sub    | 858.6±26.5   | 772.8±12.5 <sup>a</sup>  | 746.4±26.7 <sup>b</sup>   | <b>.003</b>     |
|       | ERC    | 564.6±27.1   | 539.1±24.3               | 490.3±35.5                | .304            |
|       | Total  | 4358.5±101.5 | 4067.1±74.7              | 3792.5±93.0 <sup>b</sup>  | <b>.002</b>     |

CA: Cornu Ammonis, DG: Dentate Gyrus, Sub: Subiculum, ERC: Entorhinal Cortex

\* p value of three group ANOVA. <sup>a</sup> significant post-hoc difference between healthy controls and non-depressed MS patients (BDI 0-13), <sup>b</sup> significant post-hoc difference between healthy controls and depressed MS patients (BDI>13), <sup>c</sup> significant post-hoc difference between non-depressed (BDI 0-13) and depressed (BDI>13) MS patients

**Supplementary Figure 1: Anti-depressive treatment, hippocampal atrophy and HPA axis activity.** MS patients were split into three groups: Patients who had BDI scores below the clinical cut-off and did not receive anti-depressive treatment (non-depressed, white bars, n=16), patients who had BDI scores below the clinical cut-off and received antidepressive therapy (well-controlled depression, striped bars, n=5) and patients who had BDI scores above the clinical cut-off and did not receive anti-depressive therapy (non-medicated depression, blue bars, n=7). Only the group with unmedicated depression had significantly smaller volumes in CA23DG (**A**) and total hippocampus (**B**) as well as flatter cortisol slopes (**C**) compared to controls (black bars, n=20). This indicates that effective therapy of depression in MS is associated with normal hippocampal volumes and HPA axis activity.
